# Supplementary material for: Polygenic Risk of Hypertriglyceridemia Is Modified by BMI
Source: MDPI journal article supplement (doi:10.3390/ijms23179837), 2022-08-30
Supplement: s1 [file s1]

**Table S1. Drugs excluded from the study for causing hypertriglyceridemia**

|                        |                                                                                         |
|------------------------|-----------------------------------------------------------------------------------------|
|                        | Active pharmaceutical ingredient                                                        |
| Hormone therapy        | Estrogen, 2 <sup>n</sup> , 3 <sup>rd</sup> generation progestogens, tamoxifen, steroids |
| Retinoids              | Isotretinoin, acitretin                                                                 |
| Immunosuppressors      | Cyclosporine, azathioprine, sirolimus                                                   |
| Protease inhibitors    | Amprenavir, indinavir, nelfinavir, ritonavir, saquinavir                                |
| Antipsychotic drugs    | clozapine                                                                               |
| Bile acid sequestrants | Cholestyramine, colestipol, colesvelam                                                  |

Information extracted from Catalan Institute of Pharmacology

Table S2: Description of 6 allelic variants

| Gene  | SNP (rs)   | genomic coordinates         | Change sequence             | coding/protein-coding notation | Zone       | Risk allele | Allele frequency (GNOMAD) | minor allele frequency (MAF) |
|-------|------------|-----------------------------|-----------------------------|--------------------------------|------------|-------------|---------------------------|------------------------------|
| ZPR1  | Rs964184   | NC_000011.10:g.116778201G>C | NM_003904.4: c.*724C>G      | NP                             | 3'UTR      | G           | G=0.14838<br>C=0.85162    | G=0.14838                    |
| APOA5 | Rs3135506  | NC_000011.10:g.116791691G>C | NM_052968.4: c.56C>G        | NP_00160070.1:<br>p.Ser19Leu   | exonic     | G           | G=0.0557<br>C=0.9443      | G=0.0557                     |
| GCKR  | Rs1260326  | NC_000002.12:g.27508073T>G  | NM_001486.3:c.133T>C        | NP_001477.2:p.Leu446Pro        | exonic     | T           | C=0.67473<br>T=0.32527    | T=0.32527                    |
| LPL   | Rs12678919 | NC_000008.11:g.19986711     | NC_000008.11:g.19986711A>G  | NP                             | intergenic | A           | A=0.90331<br>G=0.09669    | G=0.09669                    |
| BAZ1B | Rs7811265  | NC_000007.14:g.73520180A>G  | NM_032408.3:c.107+1647T>C   | NP                             | intronic   | A           | A=0.77928<br>G=0.22072    | G=0.22072                    |
| TRIB  | Rs2954029  | NC_000008.11:g.125478730    | NC_000008.11:g.125478730A>T | NP                             | intergenic | A           | A=0.56755<br>T=0.43245    | T=0,43245                    |

**Table S3.** Baseline characteristics of the study participants by gender.

| CLINICAL VARIABLES                      | Total        | gender        |                | p      |
|-----------------------------------------|--------------|---------------|----------------|--------|
|                                         | n=276        | Male<br>n=204 | Female<br>N=72 |        |
| Age (years)                             | 52.1 (10.5)  | 50.4 (10.2)   | 56.7 (10.0)    | <0.001 |
| BMI (kg/m <sup>2</sup> )                | 28.7 (3.8)   | 28.9 (3.7)    | 28.0 (4.2)     | 0.065  |
| Waist circumference (cm)                | 100.4 (12.5) | 102.2 (11.4)  | 95.7 (14.1)    | 0.002  |
| Current or former-smoker (%)            | 169 (61.2%)  | 134 (65.7%)   | 35 (48.6%)     | 0.011  |
| Alcohol consumption (units/w)           | 1.2 (2.7)    | 1.4 (2.9)     | 0.4 (1.8)      | 0.009  |
| Diet score (*)                          | 7.5 (3.3)    | 7.3 (3.4)     | 7.6 (3.3)      | 0.440  |
| Physical activity (hours/week)          | 2.6 (3.0)    | 2.5 (3.2)     | 2.7 (2.9)      | 0.558  |
| HTA (%)                                 | 94 (34.1%)   | 65 (31.9%)    | 29 (40.3%)     | 0.195  |
| DM (%)                                  | 49 (17.8)    | 37 (18.1%)    | 12 (16.7%)     | 0.779  |
| Chronic renal disease (%)               | 19 (6.9)     | 14 (6.9%)     | 5 (6.9%)       | 0.981  |
| Atherothrombotic cardiovascular disease | 75 (27.2%)   | 55 (27.0%)    | 20 (27.8%)     | 0.893  |
| Pancreatitis (%)                        | 2 (0.7%)     | 2 (1.0%)      | 0 (0%)         | >0.999 |
| Total cholesterol (mmol/L)*             | 6.7 (1.8)    | 6.6 (1.7)     | 7.1 (1.9)      | 0.040  |
| HDL-c (mmol/L)*                         | 0.98 (0.32)  | 0.92 (0.26)   | 1.13 (0.4)     | <0.001 |
| LDL-c (mmol/L)*                         | 3.6 (1.5)    | 3.5 (1.6)     | 3.8 (1.4)      | 0.347  |

|                            |                  |                  |                  |       |
|----------------------------|------------------|------------------|------------------|-------|
| <b>non-HDL-c (mmol/L)*</b> | 5.7 (1.8)        | 5.7 (1.8)        | 6.0 (1.9)        | 0.236 |
| <b>TG (mmol/)</b>          | 5.3 (3.4 to 9.6) | 5.4 (3.4 to 9.9) | 4.5 (3.2 to 8.6) | 0.173 |
| <b>ApoB (mg/dL)</b>        | 1.2 (0.4)        | 1.2 (0.4)        | 1.2 (0.4)        | 0.440 |
| <b>HbA1c (%)</b>           | 5.87 (0.71)      | 5.89 (0.77)      | 5.80 (0.47)      | 0.377 |

Results are expressed as mean and standard deviation (sd), median (interquartile range) or in n (percentage). \* Diet score was calculated according to a standardized questionnaire [18]. GRS: Genetic Risk Score; DM: diabetes mellitus; ApoB: apolipoprotein B; HbA1c: glycated hemoglobin; BMI: body mass index; HTA: hypertension; TC: total cholesterol, LDL-c: low density lipoprotein cholesterol, HDL-c: high density lipoprotein cholesterol, non-HDL-c: non-high density lipoprotein cholesterol, TG: triglycerides. TC, HDL-c, LDL-c, non-HDL-c values correspond to the blood test with the highest TG values for each patient.

Table S4: Comparison of the frequency of the allelic variants frequency observed between the general population and our sample.

| GENE (VARIANT)                                       | WILD TYPE                       | HETEROZYGOUS                     | HOMOZYGOUS                        | P                       |
|------------------------------------------------------|---------------------------------|----------------------------------|-----------------------------------|-------------------------|
| <b>ZPR1 (rs964184)</b><br>General<br>Study sample    | <b>CC</b><br>77%<br>130 (47.1%) | <b>CG</b><br>22%<br>120 (43.5%)  | <b>GG</b><br>1%<br>26 (9.4%)      | 2.089x10 <sup>-34</sup> |
| <b>APOA5 (rs3135506)</b><br>General<br>Study sample  | <b>CC</b><br>94%<br>199 (72.1%) | <b>CG</b><br>6%<br>68 (24.6%)    | <b>GG</b><br>0.001%<br>9 (3.3%)   | 5.673x10 <sup>-57</sup> |
| <b>GCKR (rs1260326)</b><br>General<br>Study sample   | <b>CC</b><br>33%<br>54 (19.6%)  | <b>CT</b><br>50%<br>153 (55.4%)  | <b>TT</b><br>17%<br>69 (25.0%)    | 6.913x10 <sup>-07</sup> |
| <b>LPL (rs12678919)</b><br>General<br>Study sample   | <b>GG</b><br>3.5%<br>2 (0.7%)   | <b>AG</b><br>16%<br>29 (10.5%)   | <b>AA</b><br>80.5%<br>245 (88.8%) | 0.00043                 |
| <b>BAZ1B (rs78112659)</b><br>General<br>Study sample | <b>CC</b><br>3.5%<br>9 (3.3%)   | <b>CT</b><br>34.5%<br>47 (17.0%) | <b>TT</b><br>62%<br>220 (79.7%)   | 4.991x10 <sup>-10</sup> |
| <b>TRIB (rs29540299)</b><br>General<br>Study sample  | <b>TT</b><br>10%<br>28 (10.1%)  | <b>TA</b><br>57%<br>130 (47.1%)  | <b>AA</b><br>33%<br>118 (42.8%)   | 0.00193                 |

Population frequency data have been obtained from 1000 genome datasets (available in

<https://www.internationalgenome.org/>)

Table S5: Analysis of the interaction between the genetic risk score (GRS) and different clinical variables

| Model               |                          | Unstandardized Coefficients | 95% Confidence Interval |             | Standardized Coefficients | Sig.        |
|---------------------|--------------------------|-----------------------------|-------------------------|-------------|---------------------------|-------------|
|                     |                          |                             | Lower Bound             | Upper Bound |                           |             |
| BMI                 | (Constant)               | 22,890                      | -2,749                  | 48,528      |                           | ,080        |
|                     | GRS                      | -2,963                      | -6,677                  | ,751        | -,667                     | ,117        |
|                     | BMI (kg/m2)              | -,847                       | -1,745                  | ,052        | -,487                     | ,065        |
|                     | GRS*BMI interaction      | ,149                        | ,019                    | ,278        | 1,163                     | <b>,024</b> |
| Gender              | (Constant)               | -1,980                      | -6,367                  | 2,407       |                           | ,375        |
|                     | GRS                      | 1,463                       | ,837                    | 2,088       | ,324                      | ,000        |
|                     | Gender                   | 3,753                       | -4,379                  | 11,886      | ,245                      | ,364        |
|                     | GRS*Gender interaction   | -,708                       | -1,829                  | ,413        | -,343                     | ,215        |
| Age                 | (Constant)               | -8,657                      | -27,637                 | 10,323      |                           | ,370        |
|                     | GRS                      | 2,477                       | -,120                   | 5,075       | ,548                      | ,061        |
|                     | Age                      | ,156                        | -,204                   | ,515        | ,242                      | ,394        |
|                     | GRS*Age interaction      | -,024                       | -,073                   | ,025        | -,400                     | ,329        |
| Diet score          | (Constant)               | 1,184                       | -8,125                  | 10,493      |                           | ,802        |
|                     | GRS                      | 1,101                       | -,229                   | 2,432       | ,243                      | ,104        |
|                     | Diet score               | -,223                       | -1,351                  | ,905        | -,110                     | ,698        |
|                     | GRS*Diet interaction     | ,013                        | -,147                   | ,174        | ,051                      | ,872        |
| DM                  | (Constant)               | -,502                       | -4,500                  | 3,495       |                           | ,805        |
|                     | GRS                      | 1,151                       | ,591                    | 1,712       | ,255                      | ,000        |
|                     | DM                       | -1,315                      | -11,446                 | 8,815       | -,075                     | ,798        |
|                     | GRS*DM interaction       | ,471                        | -,973                   | 1,915       | ,188                      | ,521        |
| Physical activity   | (Constant)               | -1,486                      | -6,578                  | 3,606       |                           | ,566        |
|                     | GRS                      | 1,426                       | ,702                    | 2,151       | ,310                      | ,000        |
|                     | Physical activity (h/w)  | -,007                       | -1,298                  | 1,284       | -,003                     | ,991        |
|                     | GRS*Physic.Act. interac. | -,023                       | -,200                   | ,153        | -,079                     | ,793        |
| Alcohol consumption | (Constant)               | ,051                        | -4,059                  | 4,160       |                           | ,981        |
|                     | GRS                      | 1,141                       | ,558                    | 1,724       | ,252                      | ,000        |
|                     | Alcohol cons.(u/w)       | -,829                       | -2,316                  | ,658        | -,331                     | ,273        |
|                     | GRS*Alcohol interaction  | ,115                        | -,114                   | ,344        | ,297                      | ,324        |

DM: Diabetes mellitus. Physic.Act. interact: Physical activity interaction.
